# Supplementary material for: Angiostrongylus cantonensis an Atypical Presenilin: Epitope Mapping, Characterization, and Development of an ELISA Peptide Assay for Specific Diagnostic of Angiostrongyliasis
Source: MDPI journal article supplement (doi:10.3390/membranes12020108), 2022-01-19
Supplement: s1 [file s1]

# Angiostrongilus cantonensis an Atypical Presenilin: Epitope Mapping, Characterization, and Development of an ELISA Peptide Assay for Specific Diagnostic of Angiostrongyliasis

Salvatore G. De-Simone <sup>1,2,3,\*</sup>, Paloma Napoleão-Pêgo <sup>1</sup>, Priscila S. Gonçalves <sup>1,3</sup>, Guilherme C. Lechuga <sup>1</sup>, Arnaldo Mandonado, Jr. <sup>4</sup>, Carlos Graeff-Teixeira <sup>5</sup> and David W. Provance, Jr. <sup>1</sup>

<sup>1</sup> Center of Technological Development in Health (CDTS), National Institute of Science and Technology for Innovation on Neglected Diseases (INCT-IDN), FIOCRUZ, Rio de Janeiro, RJ 21040-900, Brazil; paloma.peggo@cdts.fiocruz.br (P.N.-P.); priscilla.desimone@cdts.fiocruz.br (P.S.G.); guilherme.lechuga@cdts.fiocruz.br (G.C.L.); bill.provance@cdts.fiocruz.br (D.W.P.J.)

<sup>2</sup> Laboratory of Epidemiology and Molecular Systematics (LESM), Oswaldo Cruz Institute, FIOCRUZ, Rio de Janeiro, RJ 21040-900, Brazil

<sup>3</sup> Department of Cellular and Molecular Biology, Biology Institute, Federal Fluminense University, Niterói, RJ 24220-900, Brazil

<sup>4</sup> Laboratory of Biology and Parasitology of Wild Mammals Reservoirs, Oswaldo Cruz Institute, FIOCRUZ, Rio de Janeiro, RJ 21040-360, Brazil; maldonado@ioc.fiocruz.br

<sup>5</sup> Infectious Diseases Unit, Department of Pathology, Federal University of Espírito Santo, Vitória, ES 29075-910, Brazil; carlos.teixeira@ufes.br

\* Correspondence: dsimone@cdts.fiocruz.br

| Spot | Sequence        | A29 | KFYCFLTGFMFSTF   | B29 | EVKECTPVQDKVKS  |
|------|-----------------|-----|------------------|-----|-----------------|
| A01  | IHGRFVMDGSGSNT  | A30 | LTGFIMFSTFLLVSL  | B30 | TPVQDKVKSVPSSGR |
| A02  | VMDGSGSNTDLKQE  | B01 | MFSTFLLVSLFSFVQ  | C01 | KVKSVPSGRFIESF  |
| A03  | SGSNTDLKQEVKTVN | B02 | LLVSLFSFVQYQIL   | C02 | PSSGRFIESFRMPSL |
| A04  | DLKQEVKTVNDETAS | B03 | FSFVQYQILSDLV    | C03 | FIESFRMPSLKSND  |
| A05  | VKTVNDETASKSKER | B04 | YQILSDLVNVPVSIV  | C04 | RMPSLKSNDERNIR  |
| A06  | DETASKSKERTISTT | B05 | SDLVNVPVSIVFIGFL | C05 | KSNDERNIRLGLGD  |
| A07  | KSKERTISTTARNRK | B06 | PVSIVFIGFLHINLS  | C06 | ERNIRLGLGDFIFYS |
| A08  | TISTTARNRKAASNT | B07 | FIGFLHINLSAIELM  | C07 | LGLGDFIFYSLLVGT |
| A09  | ARNRKAASNTGISEK | B08 | HINLSAIELMSIFWK  | C08 | FIFYSLLVGTASTHG |
| A10  | AASNTGISEKVKRLY | B09 | AIELMSIFWKGPML   | C09 | LLVGTASTHGDWATT |
| A11  | GISEKVKRLYGPTDM | B10 | SIFWKGPMLQQASL   | C10 | ASTHGDWATTLALFR |
| A12  | VKRLYGPTDMVKVVF | B11 | GPMLQQASLILIAV   | C11 | DWATTLALFRVYLN  |
| A13  | GPTDMVKVFPVSIT  | B12 | QQASLILIAVTVLT   | C12 | LALFRVYLNRSWFHS |
| A14  | VKVFPVSITMFIIV  | B13 | ILIAVTVLTIMQIL   | C13 | VYLNRSWFHSCSPSS |
| A15  | PVSITMFIIVTCVRN | B14 | TVTLTIMQILPQWTS  | C14 | SWFHSCSPSSSKGT  |
| A16  | MFIVVTCVRNFDIYH | B15 | IMQILPQWTSWALLV  | C15 | CSPSSSKGTASTTN  |
| A17  | TCVRNFDIYHGVNLI | B16 | PQWTSWALLVTLALW  | C16 | TSKGTASTTNIRHIW |
| A18  | FDIYHGVNLIPTPYV | B17 | WALLVTLALWDLFAV  | C17 | ASTTNIRHIWCDRYF |
| A19  | GVNLIPTPYVIYNP  | B18 | TLALWDLFAVLTCPG  | C18 | IRHIWCDRYFSSRFA |
| A20  | PTPYVIYNPAADPG  | B19 | DLFAVLTCPGPKLL   | C19 | CDRYFSSRFAMSKFA |
| A21  | IYNPAADPGTKLLH  | B20 | LTPCGPKLLVETAE   | C20 | SSRFAMSKFAVELNR |
| A22  | AADPGTKLLHAVANA | B21 | PKLLVETAEERGED   | C21 | MSKFAVELNRKQIFI |
| A23  | TKLLHAVANAATFLV | B22 | VETAEERGEDLMPAI  | C22 |                 |
| A24  | AVANAATFLVVVAIS | B23 | ERGEDLMPAIITGS   | C23 | DREKLQERLAKLAG  |
| A25  | ATFLVVVAISTFALL | B24 | LMPAIITGSASLPQ   | C24 | HPGSVNEFDF      |
| A26  | VVAISTFALLCLFYF | B25 | IYTGASLPQSDSIE   | C25 | AVNFPNPPGKGGG   |
| A27  | TFALLCLFYKFYCF  | B26 | ASLPQSDSIESRRTS  | C26 | QEVRYF          |
| A28  | CLFYKFYCFLTGFI  | B27 | SDSIESRRTSEVKEC  |     |                 |
|      |                 | B28 | SRRTSEVKECTPVQD  |     |                 |

**Figure S1.** List of synthesized peptides covering the entire sequence of aspartyl protease (C7BVX5) from *Angiostrongilus cantonensis*. (F3, F4, F5, F11, F12, F13 positive controls and F9, F17 negative controls).

| Entry                      | E-value  | Score | Ident (%) | Organism                             | Protein name | Length |
|----------------------------|----------|-------|-----------|--------------------------------------|--------------|--------|
| <a href="#">C7BVX5</a>     | -        | -     | -         | <i>Angiostrongylus cantonensis</i>   | Presenilin   | 415    |
| <a href="#">A0A0K0DB71</a> | 0.0      | 1,584 | 77.5      | <i>Angiostrongylus cantonensis</i>   | Presenilin   | 414    |
| <a href="#">A0A0D8XWV7</a> | 1.3e-132 | 1,005 | 64.2      | <i>Dictyocaulus viviparus</i>        | Presenilin   | 315    |
| <a href="#">A0A016U204</a> | 5.4e-110 | 866   | 45.7      | <i>Ancylostoma ceylanicum</i>        | Presenilin   | 425    |
| <a href="#">A0A016TZZ8</a> | 9.6e-108 | 852   | 45.6      | <i>Ancylostoma ceylanicum</i>        | Presenilin   | 435    |
| <a href="#">A0A0R3PEK8</a> | 1.0e-128 | 972   | 79.8      | <i>Angiostrongylus costaricensis</i> | Presenilin   | 409    |
| <a href="#">G0N7M3</a>     | 6.5e-118 | 904   | 77.0      | <i>Caenorhabditis brenneri</i>       | Presenilin   | 444    |

**Figure S2.** Identity of the *A. cantonensis* aspartyl protease (C78VXS) used in our study with major other proteins deposited in data bank.

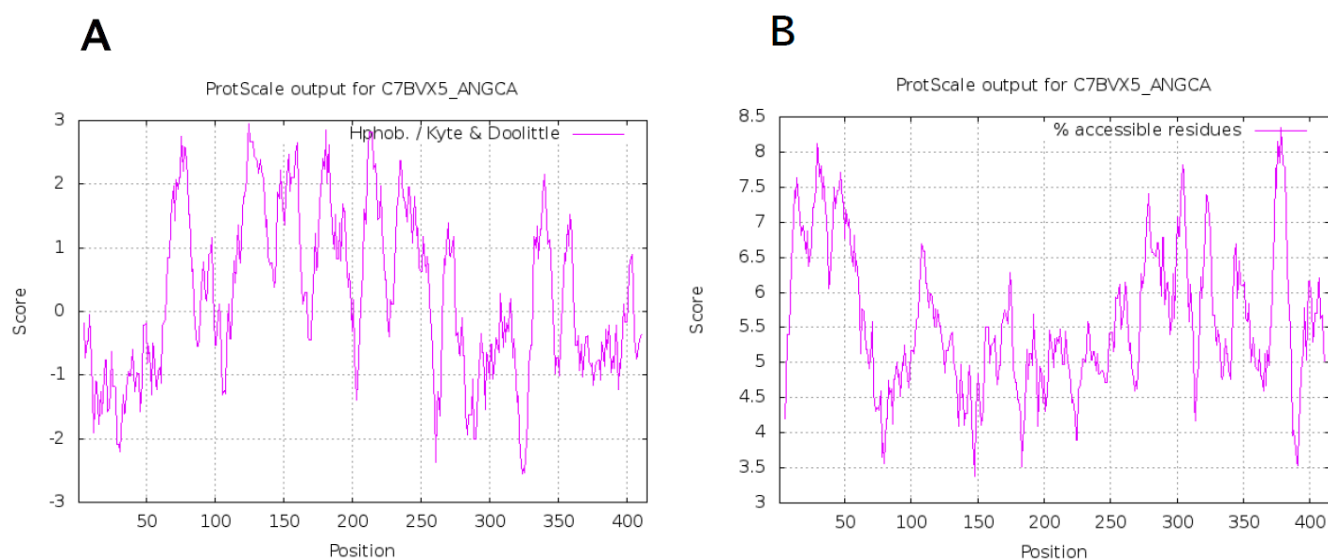

**Figure S3.** Hydropathicity (A) and amino acid accessibility (B) of amino acids of the *A. cantonensis* aspartyl protease.

```

1: -----IHGRFVMEGSGSNTDLKQEVKTVDNETASKSKERTI-----STTARNskaASTNGISEKVKRLYGPTDMVKVF 69
2: -----0
3: -----MEDGSGSNTDLKQEVKTVDNETASKSKERTI-----STTARNskaASTNGISEKVKRLYGPTDMVKVF 63
4: MSSSTVCTEQELVLSGIDTSEE--SP-ITMANEARSRSNGENVNGSRPTTSAEVATTSAEIASSSRKEKNYGPQDMVKVF 77
5: MS-SSKSIGKTLVYKGDARHD--EE-DAITGEKKRRGENAAAAGSS-----RAKAKKSTSHRQHEKNYGPQDMVKVF 69
6: --P-----SCTS-----QPGTQEHPA-----TVRRTSTLGSGENEEEEAEELKYGASHVINLF 45
7: MPY-----SREP-----QDGGGNTSASSETHTT---YGTNLISNRSEPEEENQVEEAEELKYGASHVIHLF 57

```

|    | PSAg1                                                                             | PSAg2 | PSAg3 |     |
|----|-----------------------------------------------------------------------------------|-------|-------|-----|
| 1: | VPVSITMFIVVTCVRNFDIYHGVNLIPTPYIYNPAADPGTKLLHAVANAATFLVVAISTFALLCLFYKFCFLTGF       |       |       | 149 |
| 2: | -----MIYTEPSDDAVTELLHAINASTFLLLVISTFLLLFLFYKFCFLHGF                               |       |       | 50  |
| 3: | VPVSITMFIVVTCVRNFDIYHGVNLIPTPYIYNPAADPGTKLLHAVANAATFLVVAISTFLLCLFYKFCYCTG---      |       |       | 140 |
| 4: | VPVSICMAIVTVITRVEIYRQDVTIKTPYIYHDPPEAEPTKLWHSLVNAATFLCVIVVSTFGVLALFYKFCYRCLNFF    |       |       | 157 |
| 5: | VPVSICMTIIVIICTRNVEVYQKDIIILRTPYIYHDPPEAEPTKLWHSVMNAAVLLCVVVVATFGVLALFYCKCYRFLTIF |       |       | 149 |
| 6: | VPVSIcMVMVFTMNTVTFYSYNDGRHLLYTPFVKETDSTSEKVLMSLGNALVMLCVVIIMTVILIVFYKYRCYKVITAW   |       |       | 125 |
| 7: | VPVSLCMALVFTMTITITFYSQNGRHLLYTPFVKETDSIVEKGLMSLGNALVMLSVVIVMTVLLIFFYKYKFKLIHGW    |       |       | 137 |

|    | PSAg4                                                                           | PSAg5 |     |
|----|---------------------------------------------------------------------------------|-------|-----|
| 1: | IMFSTFLLVSLFSFVQYQIILSDLNVP-----VSIVFIGFLHINLSAIELMSIFWKGPMLRQQASLILIAVTV       |       | 217 |
| 2: | IMLSTFMLVTLFSFMQYQIILSDLNIP-----VSIVVMVFIHLNIAVQLMSIFWIGPMKVQQGSLILISVTV        |       | 118 |
| 3: | -----YFRQIILSDLNVP-----VSIVFIGFLHINLSAIELMSIFWKGPMLRQQASLILIAVTV                |       | 193 |
| 4: | IMFSTFMLITTASLMQYYEVLRAINFP-----ISSATVLLLHTNMAVIGLMSIFWKGPRLVQGGTLVLMAMV        |       | 225 |
| 5: | FMFATFMLITIMTALQYHEILRAINVP-----VSAVTFLLHLNVAVIGLMSIFWKGPMLVQATLILMAAMV         |       | 217 |
| 6: | LMVSSCLLLFLFSTIYFAVL-KSFTSCEFSFFQRSDEKAVETTASMFSLRFFLLDSTCLTHCH--PFFQFYLIAMSALM |       | 202 |
| 7: | LIISFLLFLFTAIYVQEVLSKFDVS-----PSVILVLFGLGNYGVLGMMCIHWKGPLRLQQFYLIITMSALM        |       | 205 |

|    | PSAg6                                                                           | PSAg7 |     |
|----|---------------------------------------------------------------------------------|-------|-----|
| 1: | TLTIMQILPQWTSWALLVTLALWDLFAVLTPCGPLKLLVETAERGEDLMPAIIYTGASLPQSDSI-----          |       | 284 |
| 2: | TLTIMQILPKWTSWLLVTLALWDLFAVLSPCGPLKLLVETAERGEDLMPAMIYTGIAFLQSTSSK-----          |       | 186 |
| 3: | TLTIMQILPQWTSWALLVTLALWDLFAVLTPCGPLKLLVETAERGEDLMPAIIYSMLVLLHFHNQTLNRVARQKLK-N  |       | 272 |
| 4: | TLTIMRVLPRTNWMVILLAFWDLCAVLSPCGPLKILVETAERGEDLMPAIIYTGAAISIEKTESTQ-----         |       | 293 |
| 5: | TLTIMRVFPKWTSAIVILLAFWDIFAVLSPCGPLKILVEIAERDEELMAAIIYSTQPFEEKKLKLYDI---CIS-A    |       | 293 |
| 6: | ALVFIKYLPEWTVWVFLVVISVWDLVAVLTPKGPLRYLVETAQERNEPIFPALIYSS-GIIPYVVLVAVKNSEEGTEMP |       | 281 |
| 7: | ALVFIKYLPEWTVWVFLVVISVWDLVAVLTPKGPLRYLVETAQERNEPIFPALIYSS-GIIPYVVLVAVKNSEEGTEMP |       | 384 |

|    | PSAg8                                                                           |     |
|----|---------------------------------------------------------------------------------|-----|
| 1: | -----ESRRTSEVKECTPVQDK---VKSVPs---SGRFIESFRMPS-----LKS-NDDERNIRLGLGD            | 335 |
| 2: | -----SPTSAEVEGSSPIKDK---IKT-KS---SGNTVESLRMPS-----LNS-EAEERNIRLGLGD             | 235 |
| 3: | GIEIFDDGKPAISYKFIVPRDCTPVQDK---VKSVPs---SGRFIESFRMPS-----LKS-NDDERNIRLGLGD      | 334 |
| 4: | G---SQTPP-----TAVDRSPTNEK---RSASRS---PLRRSGSQPIPS-----NSVSAEEESNIRLGLGD         | 345 |
| 5: | GSATLSRTEPKQSDSLASGEESPTK-E---RRSSRS---SVRTVESLRIPS-----FSETDEEDRNIRLGLGD       | 355 |
| 6: | IS-----SNLPLE-----FVFS-CFEACFTAGMVPsFLVLHN-----VVQICNISEGVKLGLGD                | 329 |
| 7: | TTSSASSSQPSNVPKKTTKVKRIPQKVQIETNVSSNPQGETPVARVERERQPIVNVEPVQYVRHEDYQEEKGVKLGLGD | 364 |

|    | PSAg9                                                                             | PSAg10 | PSAg11 | PSAg12 | PSAg13 |     |
|----|-----------------------------------------------------------------------------------|--------|--------|--------|--------|-----|
| 1: | FIFYSLLVGTASTHGDWATTLALFRVYLNRSWFHSCSPSSTSGKTASTTNIRHIWCDRYFSSRFAMSKFAVELNRKQIFI  |        |        |        |        | 415 |
| 2: | FIFYSLLVGSASVDGDWVTTLACFVSILTGLGFTLVLLVILQKALPALPISITFGVLAYFSSRYAVSKFVLELNRKLMFL  |        |        |        |        | 315 |
| 3: | FIFYSLLVGTASTHGDWATTLACFVSILTGLGFTLVLLVILQKALPALPISVTFGVIAFYSSRFAMSKFAVELNRKQIFI  |        |        |        |        | 414 |
| 4: | FIFYSLLVGNATVLADWTTIVACAVSILVGLAFTLVLLVIFQKALPALPISIAFGAIAFFSSKFVTSKYLDRLNSEQIFL  |        |        |        |        | 425 |
| 5: | FIFYSILVGNAAVLADLTTLACFVSILVGLGFTLILLVIVQKALPALPISIAFGAITFFVSKLVTSKLIQDLNKEAIFL   |        |        |        |        | 435 |
| 6: | FIFYSVLVGKASSYFDWNTTVACYVAILVGLCFTLLLLAVFRRALPALPISIFAGLLFYFCTRWIVTPYVSEITRRQWVY  |        |        |        |        | 409 |
| 7: | FIFYSVLLGKASSYFDWNTTLACYVAILIGLCFTLVLLAVFKRALPALPISIFSGLLIFYFCTRWIITPFVTKFTQNCLLY |        |        |        |        | 444 |

**Figure S4.** Cross-reactivity of the six-presenilin nematode proteins deposited in the database with a higher degree of identity (45–80%) with *A. cantonensis*. BLAST was carried out in the UniProt (Universal Protein) database of the EBI (European Bioinformatics Institute), using the C7BVX5 protein from the organism “*Angiostrongylus cantonensis*” as input. (1) C7BVX5 (*Angiostrongylus cantonensis*); (2) A0A0D8XWV7 (*Dictyocaulus viviparus*); (3) A0A0K0DB71 (*Angiostrongylus cantonensis*); (4) A0A016U204 (*Ancylostoma ceylanicum*); (5) A0A016TZZ8 (*A. ceylanicum*); (6) A0A0R3PEK8 (*A. costaricensis*); (7) G0N7M3 (*Caenorhabditis brenneri*).



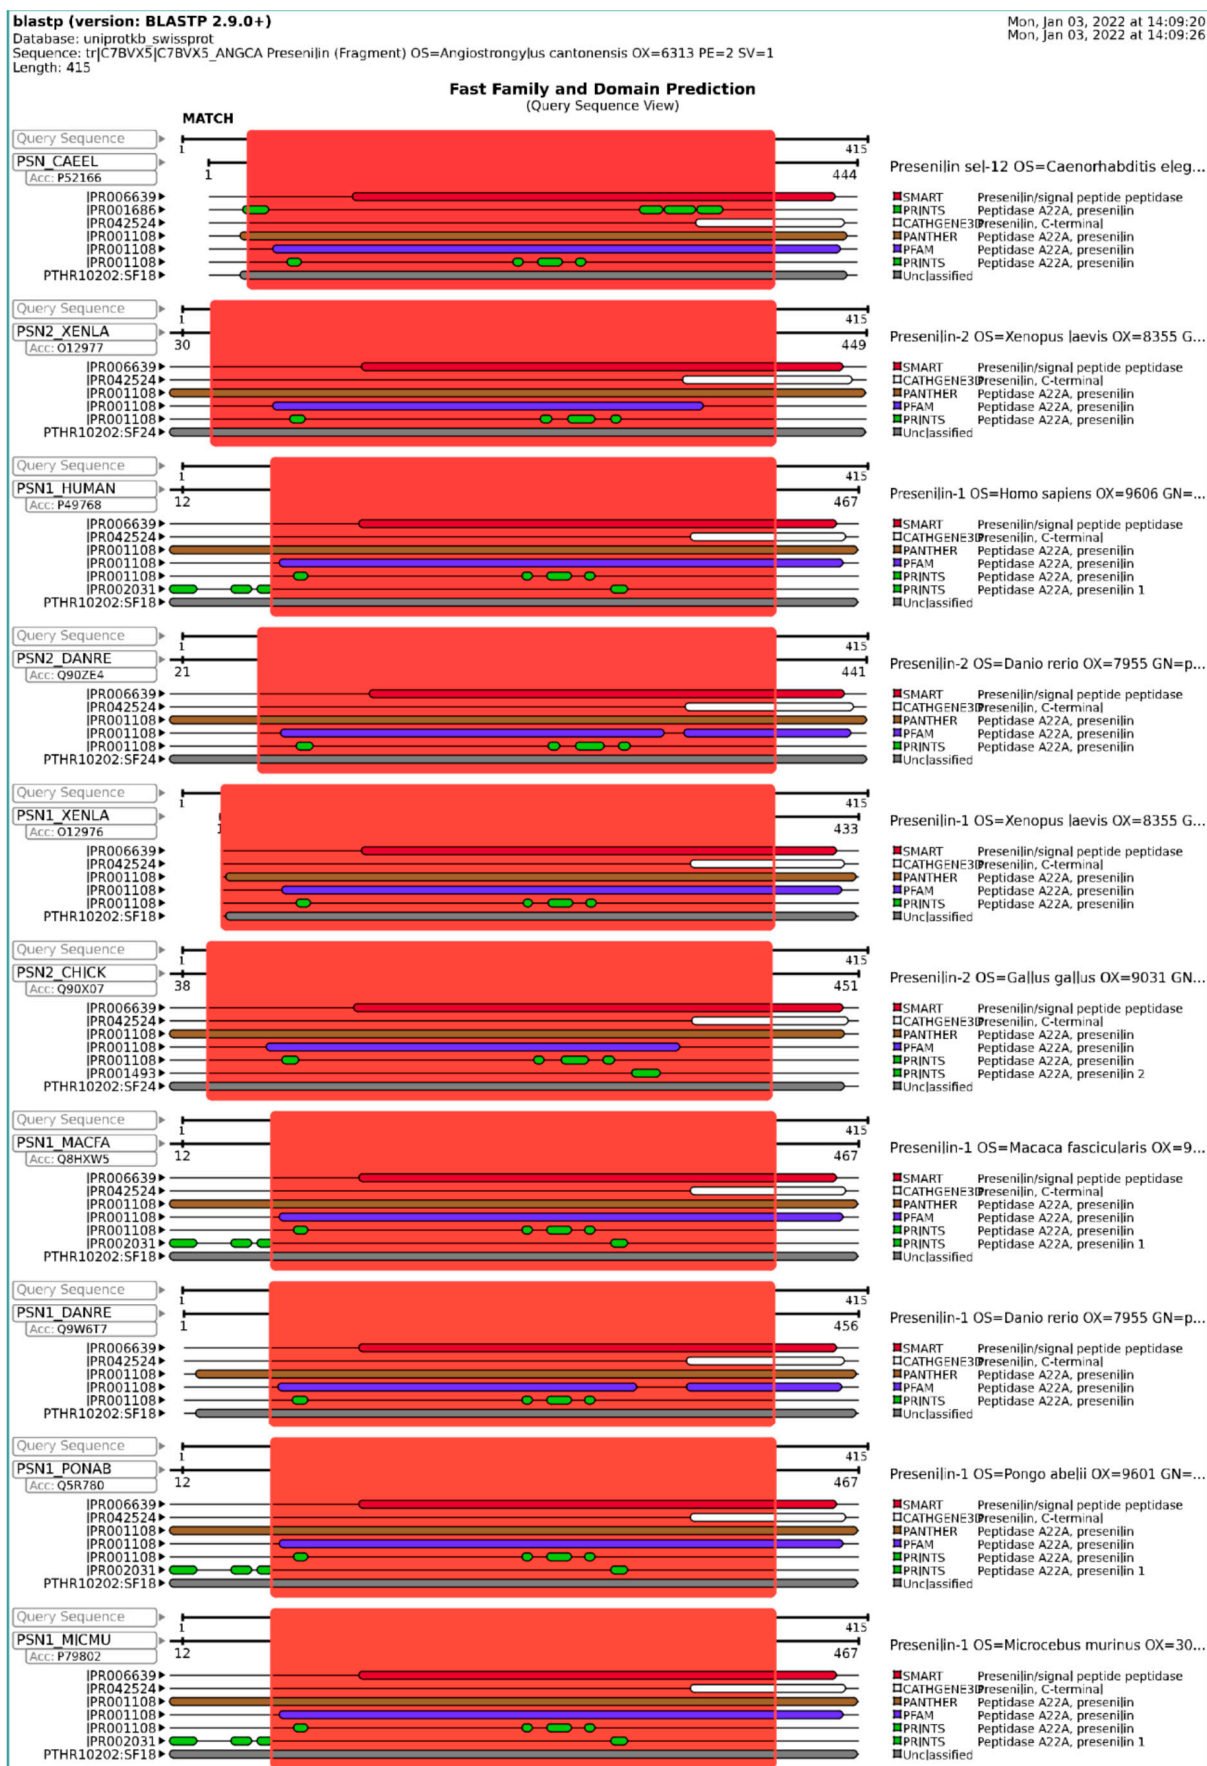

**Figure S5.** Multiple sequence alignment for functional prediction of AgPS.
